# Supplementary figures and images for: Modeling the mechanosensitivity of fast-crawling cells on cyclically stretched substrates
Source: Royal Society of Chemistry journal article supplement (doi:10.1039/c8sm01903g), 2018-12-14

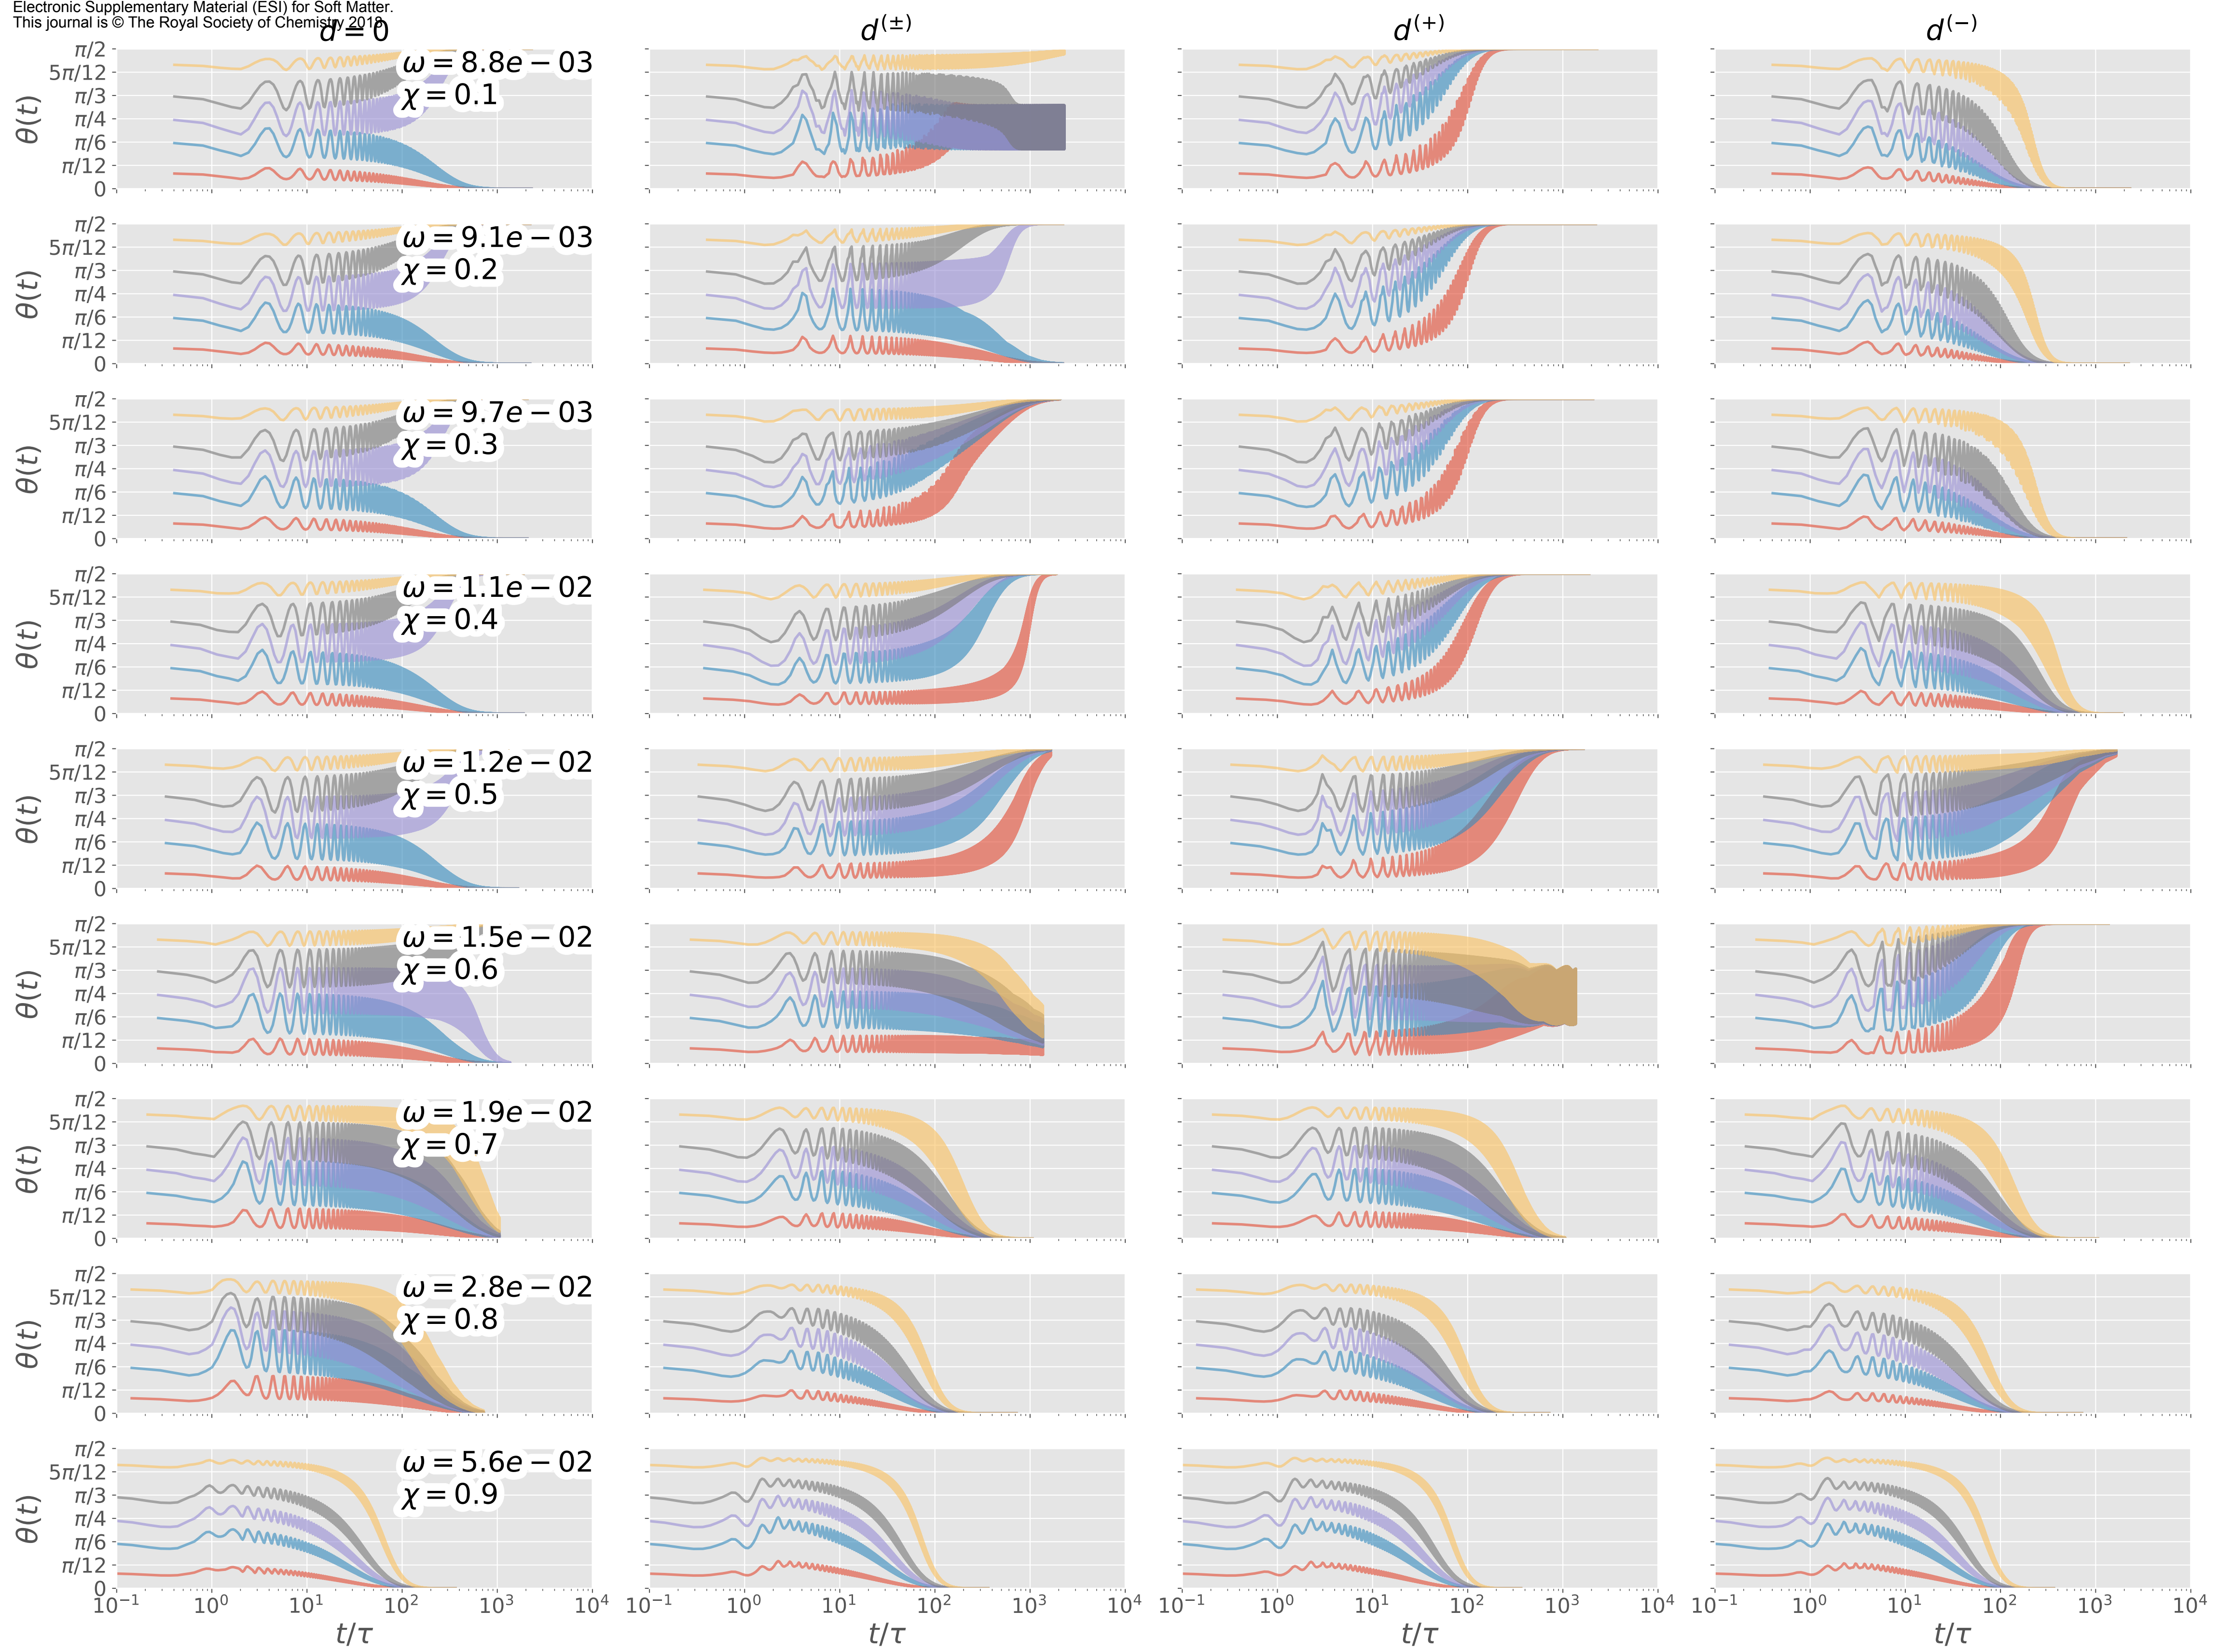

Supplement: c8sm01903g2.pdf [file c8sm01903g2.pdf]
